# Supplementary material for: The Association of Circulating Amino Acids and Dietary Inflammatory Potential with Muscle Health in Chinese Community-Dwelling Older People
Source: MDPI journal article supplement (doi:10.3390/nu14122471), 2022-06-15
Supplement: s1 [file s1]

## Supplementary Materials

**Supplementary Table S1.** The association of baseline serum amino acids with the changes of muscular parameters over 4 years.

| AAs                             | Grip strength (kg)                 | Gait speed (m/s)                   | Chair stand test (s)               | Appendicular muscle mass (kg/m <sup>2</sup> ) |
|---------------------------------|------------------------------------|------------------------------------|------------------------------------|-----------------------------------------------|
|                                 | Men                                |                                    |                                    |                                               |
|                                 | $\beta$ estimate (SE) <sup>a</sup>            |
| DII (per one tertile)           | −0.332 (0.143) <sup>b</sup>        | −0.013 (0.006) <sup>b</sup>        | 0.075 (0.104)                      | 0.009 (0.010)                                 |
| Branched chain amino acids      |                                    |                                    |                                    |                                               |
| Valine (per one tertile)        | 0.008 (0.148)                      | −0.005 (0.006)                     | 0.010 (0.107)                      | −0.008 (0.011)                                |
| Leucine (per one tertile)       | 0.037 (0.150)                      | −0.001 (0.006)                     | −0.160 (0.107)                     | 0.008 (0.011)                                 |
| Isoleucine (per one tertile)    | 0.142 (0.149)                      | −0.004 (0.006)                     | −0.120 (0.108)                     | 0.002 (0.011)                                 |
| Aromatic amino acids            |                                    |                                    |                                    |                                               |
| Phenylalanine (per one tertile) | 0.025 (0.147)                      | −0.003 (0.006)                     | −0.135 (0.107)                     | 0.007 (0.011)                                 |
| Tryptophan (per one tertile)    | 0.197 (0.144)                      | 0.010 (0.006)                      | 0.043 (0.104)                      | 0.014 (0.010)                                 |
| Tyrosine (per one tertile)      | 0.369 (0.142) <sup>b</sup>         | −0.004 (0.006)                     | −0.066 (0.103)                     | 0.009 (0.010)                                 |
| Sulfur amino acids              |                                    |                                    |                                    |                                               |
| Methionine (per one tertile)    | 0.221 (0.144)                      | 0.000 (0.006)                      | −0.193 (0.104)                     | −0.004 (0.010)                                |
| tHcy (per one tertile)          | 0.004 (0.163)                      | 0.001 (0.007)                      | 0.199 (0.118)                      | −0.007 (0.012)                                |
| Cystathionine (per one tertile) | −0.285 (0.152)                     | 0.000 (0.006)                      | −0.157 (0.110)                     | −0.012 (0.011)                                |
| tCys (per one tertile)          | −0.234 (0.157)                     | 0.003 (0.007)                      | 0.265 (0.114) <sup>b</sup>         | −0.003 (0.011)                                |
| Taurine (per one tertile)       | −0.018 (0.147)                     | 0.011 (0.006)                      | −0.198 (0.106)                     | −0.012 (0.011)                                |
| tGSH (per one tertile)          | 0.450 (0.144) <sup>b,c</sup>       | 0.016 (0.006) <sup>b</sup>         | −0.259 (0.105) <sup>b</sup>        | 0.003 (0.010)                                 |
| Women                           |                                    |                                    |                                    |                                               |
|                                 | $\beta$ estimate (SE) <sup>a</sup>            |
| DII (per one tertile)           | 0.071 (0.099)                      | −0.003 (0.005)                     | 0.172 (0.173)                      | −0.007 (0.009)                                |
| Branched chain amino acids      |                                    |                                    |                                    |                                               |
| Valine (per one tertile)        | −0.002 (0.101)                     | 0.000 (0.005)                      | −0.077 (0.176)                     | −0.009 (0.010)                                |

|                                 |                             |                             |                |                             |
|---------------------------------|-----------------------------|-----------------------------|----------------|-----------------------------|
| Leucine (per one tertile)       | 0.044 (0.102)               | −0.003 (0.006)              | −0.095 (0.179) | 0.000 (0.010)               |
| Isoleucine (per one tertile)    | −0.062 (0.102)              | −0.007 (0.005)              | 0.219 (0.178)  | −0.008 (0.010)              |
| Aromatic amino acids            |                             |                             |                |                             |
| Phenylalanine (per one tertile) | 0.117 (0.101)               | 0.005 (0.005)               | −0.076 (0.176) | 0.014 (0.009)               |
| Tryptophan (per one tertile)    | −0.025 (0.100)              | 0.005 (0.005)               | −0.331 (0.173) | −0.022 (0.009) <sup>b</sup> |
| Tyrosine (per one tertile)      | 0.033 (0.100)               | −0.003 (0.005)              | −0.157 (0.173) | −0.003 (0.009)              |
| Sulfur amino acids              |                             |                             |                |                             |
| Methionine (per one tertile)    | 0.151 (0.100)               | −0.009 (0.005)              | 0.038 (0.174)  | −0.005 (0.009)              |
| tHcy (per one tertile)          | −0.118 (0.115)              | −0.007 (0.006)              | 0.021 (0.200)  | 0.012 (0.011)               |
| Cystathionine (per one tertile) | −0.138 (0.108)              | −0.006 (0.006)              | 0.050 (0.187)  | −0.001 (0.010)              |
| tCys (per one tertile)          | −0.282 (0.109) <sup>b</sup> | 0.000 (0.006)               | 0.015 (0.190)  | 0.016 (0.010)               |
| Taurine (per one tertile)       | −0.073 (0.1)                | −0.011 (0.005) <sup>b</sup> | 0.045 (0.173)  | −0.002 (0.009)              |
| tGSH (per one tertile)          | 0.006 (0.100)               | −0.006 (0.005)              | 0.087 (0.175)  | 0.025 (0.009) <sup>b</sup>  |

DII: dietary inflammatory index; OR: odds ratio; CI: confidence interval; SE: standardized error. tHcy: total homocysteine; tCys; total cysteine; tGSH: total glutathione.

<sup>a</sup> in sub-fully adjusted model C: adjusted for baseline age, corresponding measurement, estimated glomerular filtration rate, current smoking, physical activity level, previous fracture, hypertension, diabetes, chronic obstructive lung disease, cardiovascular disease, rheumatoid arthritis, nonsteroidal anti-inflammatory agent use and osteoporosis medication. <sup>b</sup> indicates for significant value (P <0.05). <sup>c</sup> indicates for significant value (P <0.004) for amino acids.
